# Supplementary material for: Changes in hyperglycaemia-related testing for prediabetes and type 2 diabetes mellitus management: a prospective, cross-sectional survey of 16 years of general practice data from Australia
Source: Research Square preprint supplement (doi:10.21203/rs.3.rs-874376/v1), 2021-10-07
Supplement: Supplementary file 2 [file 23a52fdebbc9ab10235c78a5.docx]

*Box 1. Terminology*

| **Terms used in this paper** | | **ICPC-2 PLUS Code** | **Term/label** | **Clinical correlates** |
| --- | --- | --- | --- | --- |
|  | Prediabetes | A91011 A91012 A91035 A91016 A91028 | Prediabetes abnormal glucose tolerance test impaired fasting glycaemia increased blood sugar insulin resistance | Prediabetes, impaired fasting glucose (IFG), or impaired glucose tolerance (IGT) |
|  | T2DM | T90* | Diabetes, non-insulin dependent | Type 2 Diabetes Mellitus, late onset diabetes, and diabetes not otherwise specified |
| Hyperglycaemia-related tests | Glucose-related tests | T34005 T34026 T34009  T34025  T34009 | Glucose Glucose random Glucose challenging Glucose fasting Glucose tolerance | Blood glucose test, not specified  Random blood glucose test  Glucose challenge test  Fasting blood glucose test  Oral glucose tolerance test |
| HbA1c test | T34010 | HbA1c | Glycosylated haemoglobin test |
| Insulin tests | T34019 | Insulin | Insulin (fasting or random) test |

*T90 is the ICPC-2 rubric for Diabetes, non-insulin dependent. This will include all ICPC-2 PLUS terms related to T2DM
